# Supplementary material for: The pulmonary mycobiome—A study of subjects with and without chronic obstructive pulmonary disease
Source: PubMed Central journal article supplement (PMC8026037; doi:10.1371/journal.pone.0248967), 2021-04-07
Supplement: pone.0248967.s011.pdf [file pone.0248967.s011.pdf]

# **The pulmonary mycobiome - a study of subjects with and without chronic obstructive pulmonary disease**

## **Supporting Information, S4 Table**

Einar M. H. Martinsen<sup>1\*</sup>, Tomas M. L. Eagan<sup>1,2</sup>, Elise O. Leiten<sup>1</sup>, Ingvild Haaland<sup>1</sup>, Gunnar R. Husebø<sup>1,2</sup>, Kristel S. Knudsen<sup>2</sup>, Christine Drengenes<sup>1,2</sup>, Walter Sanseverino<sup>3</sup>, Andreu Paytuví-Gallart<sup>3</sup>, and Rune Nielsen<sup>1,2</sup>

<sup>1</sup>Department of Clinical Science, University of Bergen, Bergen, Norway

<sup>2</sup>Department of Thoracic Medicine, Haukeland University Hospital, Bergen, Norway

<sup>3</sup>Sequentia Biotech SL, Barcelona, Spain

\* Corresponding author

E-mail: [einar.martinsen@uib.no](mailto:einar.martinsen@uib.no)

**S4 Table. Summary of read/sequence counts in the MicroCOPD study.**

| <b>Data</b>                                   | <b>Number of samples</b> | <b>Read/sequence count</b> | <b>Mean read/sequence count</b> |
|-----------------------------------------------|--------------------------|----------------------------|---------------------------------|
| <b>Raw data</b>                               |                          |                            |                                 |
| NCS                                           | 189                      | 667,033                    | 3,529                           |
| OW                                            | 193                      | 22,933,493                 | 118,826                         |
| BAL                                           | 193                      | 20,348,685                 | 105,434                         |
| <b>Post ITSxpress</b>                         |                          |                            |                                 |
| NCS                                           | 184                      | 529,519                    | 2,878                           |
| OW                                            | 193                      | 11,907,308                 | 61,696                          |
| BAL                                           | 193                      | 5,790,865                  | 30,004                          |
| <b>Post DADA2</b>                             |                          |                            |                                 |
| NCS                                           | 161                      | 472,574                    | 2,935                           |
| OW                                            | 193                      | 11,236,458                 | 58,220                          |
| BAL                                           | 193                      | 5,317,673                  | 27,553                          |
| <b>Post LULU</b>                              |                          |                            |                                 |
| NCS                                           | 157                      | 410,205                    | 2,613                           |
| OW                                            | 193                      | 10,881,332                 | 56,380                          |
| BAL                                           | 192                      | 4,300,589                  | 22,399                          |
| <b>Without low abundance and contaminants</b> |                          |                            |                                 |
| NCS                                           | 122                      | 73,658                     | 604                             |
| OW                                            | 192                      | 9,490,666                  | 49,431                          |
| BAL                                           | 185                      | 1,663,488                  | 8,992                           |

NCS: Negative control sample, OW: oral wash, BAL: bronchoalveolar lavage, DADA2:

Divisive Amplicon Denoising Algorithm version 2.
