# Supplementary material for: The pulmonary mycobiome—A study of subjects with and without chronic obstructive pulmonary disease
Source: PubMed Central journal article supplement (PMC8026037; doi:10.1371/journal.pone.0248967), 2021-04-07
Supplement: pone.0248967.s013.pdf [file pone.0248967.s013.pdf]

# **The pulmonary mycobiome - a study of subjects with and without chronic obstructive pulmonary disease**

## **Supporting Information, S6 Table**

Einar M. H. Martinsen<sup>1\*</sup>, Tomas M. L. Eagan<sup>1,2</sup>, Elise O. Leiten<sup>1</sup>, Ingvild Haaland<sup>1</sup>, Gunnar R. Husebø<sup>1,2</sup>, Kristel S. Knudsen<sup>2</sup>, Christine Drengenes<sup>1,2</sup>, Walter Sanseverino<sup>3</sup>, Andreu Paytuví-Gallart<sup>3</sup>, and Rune Nielsen<sup>1,2</sup>

<sup>1</sup>Department of Clinical Science, University of Bergen, Bergen, Norway

<sup>2</sup>Department of Thoracic Medicine, Haukeland University Hospital, Bergen, Norway

<sup>3</sup>Sequentia Biotech SL, Barcelona, Spain

\* Corresponding author

E-mail: [einar.martinsen@uib.no](mailto:einar.martinsen@uib.no)

**S6 Table. Permuted multivariate analysis of beta-dispersion using Bray-Curtis and Jaccard distances. Comparisons were done (A) merged and (B) pairwise.**

**(A)**

| <b>Bray-Curtis, Permuted multivariate analysis of beta-dispersion on OW and BAL together</b> |           |                       |                     |          |               |                  |
|----------------------------------------------------------------------------------------------|-----------|-----------------------|---------------------|----------|---------------|------------------|
| <b>Variables</b>                                                                             | <b>Df</b> | <b>Sum of squares</b> | <b>Mean squares</b> | <b>F</b> | <b>N.Perm</b> | <b>Pr(&gt;F)</b> |
| Sequencing run                                                                               | 2         | 0.0283                | 0.014125            | 0.4192   | 1000          | 0.6913           |
| Residuals                                                                                    | 227       | 7.6481                | 0.033692            | -        | -             | -                |
| <b>Jaccard, Permuted multivariate analysis of beta-dispersion on OW and BAL together</b>     |           |                       |                     |          |               |                  |
| <b>Variables</b>                                                                             | <b>Df</b> | <b>Sum of squares</b> | <b>Mean squares</b> | <b>F</b> | <b>N.Perm</b> | <b>Pr(&gt;F)</b> |
| Sequencing run                                                                               | 2         | 0.13686               | 0.068429            | 6.4239   | 1000          | <i>0.001998</i>  |
| Residuals                                                                                    | 227       | 2.41808               | 0.010652            | -        | -             | -                |

**(B)**

| <b>Bray-Curtis, pairwise Permuted multivariate analysis of beta-dispersion on OW and BAL together.</b> |                  |                  |              |
|--------------------------------------------------------------------------------------------------------|------------------|------------------|--------------|
| <b>Observed p-value below diagonal, permuted p-value above diagonal</b>                                |                  |                  |              |
| <b>Pairs</b>                                                                                           | <b>First</b>     | <b>Second</b>    | <b>Third</b> |
| First                                                                                                  | -                | 0.3976           | 0.6553       |
| Second                                                                                                 | 0.41555          | -                | 0.5744       |
| Third                                                                                                  | 0.74603          | 0.63992          | -            |
| <b>Jaccard, pairwise Permuted multivariate analysis of beta-dispersion on OW and BAL together.</b>     |                  |                  |              |
| <b>Observed p-value below diagonal, permuted p-value above diagonal</b>                                |                  |                  |              |
| <b>Pairs</b>                                                                                           | <b>First</b>     | <b>Second</b>    | <b>Third</b> |
| First                                                                                                  | -                | <i>0.003996</i>  | 0.2418       |
| Second                                                                                                 | <i>0.0020067</i> | -                | <i>0.033</i> |
| Third                                                                                                  | 0.2095527        | <i>0.0278263</i> | -            |

OW: oral wash, BAL: bronchoalveolar lavage.
